1 **Storage root yield of sweetpotato as influenced by sweetpotato leaf curl virus and its**  
2 **interaction with sweetpotato feathery mottle virus, and sweetpotato chlorotic stunt virus in**  
3 **Kenya**

4

5 Bramwel W. Wanjala<sup>1,2,\*</sup>, Elijah M. Ateka<sup>2</sup>, Douglas W. Miano<sup>4</sup>, Jan W. Low<sup>1</sup> and Jan F.  
6 Kreuze<sup>3,†</sup>

7 Bramwel W. Wanjala, Research Associate/ Ph.D. student

8 Dr. Jan W. Low, 2016 World Food Prize Co-Laureate, Principal Scientist & co-Leader of the  
9 Sweetpotato for Profit and Health Initiative

10 <sup>1</sup>International Potato Center, SSA Regional Office, PO Box 25171 - 00603, Nairobi, Kenya.  
11 Email: [bramwelwanjala@yahoo.com](mailto:bramwelwanjala@yahoo.com), [j.low@cgiar.org](mailto:j.low@cgiar.org)

12

13 Prof. Elijah M. Ateka, Dean School of Agriculture

14 <sup>2</sup>Jomo Kenyatta University of Agriculture and Technology, P.O. Box 62000 – 00200, Nairobi,  
15 Kenya. Email: [emateka@yahoo.com](mailto:emateka@yahoo.com)

16

17 Jan F. Kreuze, Crop and Systems Science Leader

18 <sup>3</sup>International Potato Center, Avenida La Molina 1895, La Molina. Apartado Postal 1558, Lima,  
19 Peru. Email: [j.kreuze@cgiar.org](mailto:j.kreuze@cgiar.org), [s.fuentes@cgiar.org](mailto:s.fuentes@cgiar.org)

20

21 Douglas W. Miano, Senior lecturer, Department of Plant Science and Crop Protection

22 <sup>4</sup>The University of Nairobi, P.O. Box: 30197, 00100 Nairobi, Kenya. [dwatuku@yahoo.com](mailto:dwatuku@yahoo.com)

23

24 \* Kenya Agricultural and Livestock Research Organisation, Nairobi, Kenya (Current address).  
25 Email: [bramwel.wanjala@kalro.org](mailto:bramwel.wanjala@kalro.org)

26 † Corresponding author: Jan F. Kreuze, [j.kreuze@cgiar.org](mailto:j.kreuze@cgiar.org)

27

## 28 **Abstract**

29 The effect of a Kenyan strain of sweetpotato leaf curl virus (SPLCV) and its interactions with  
30 sweetpotato feathery mottle virus (SPFMV), and sweetpotato chlorotic stunt virus (SPCSV) on  
31 root yield was determined. Trials were performed during two seasons using varieties contrasting  
32 in their resistance to sweetpotato virus disease, ‘Kakamega’ and ‘Ejumula’, in a randomized  
33 complete block design with sixteen treatments replicated three times. The treatments included  
34 plants graft inoculated with SPLCV, SPFMV and SPCSV alone and in possible dual or triple  
35 combinations. Yield and yield related parameters were evaluated at harvest. Results showed  
36 marked differences in the effect of SPLCV infection on the two varieties: ‘Ejumula’, which is  
37 susceptible to SPFMV and SPCSV, suffered no significant yield loss from SPLCV infection,  
38 whereas ‘Kakamega’, which is more resistant to SPFMV and SPCSV, suffered an average of  
39 47% yield loss, despite only mild symptoms occurring in both varieties. These results highlight  
40 the variability in sensitivity to SPLCV between sweetpotato cultivars as well as a lack of  
41 correlation of SPLCV related symptoms with susceptibility to the virus. In addition, they  
42 underline the lack of correlation between resistance to the RNA viruses SPCSV and SPFMV and  
43 DNA virus SPLCV.

44 **Key words:** SPLCV, sweepovirus, SPFMV, SPCSV, treatment, yield

## 45 **Introduction**

46 Ranked seventh in global food crop production, Sweetpotato (*Ipomoea batatas*) is the third most  
47 important root and tuber crop after potato and cassava. In the developing world, it ranks fourth in  
48 importance after rice, wheat, and corn (Kays, 2005). It is one of the traditional crops that play an  
49 important role in addressing food insecurity in most rural households in Africa (Gruneberg et al.  
50 2015). Orange-fleshed sweetpotato varieties’ high  $\beta$ -carotene (source of pro-vitamin A) has seen  
51 an increased utilization in food and dietary programs aimed at addressing vitamin A deficiency;  
52 a global challenge in Sub-Saharan Africa (SSA) (Kurabachew, 2015). The crop is cultivated all-  
53 round the year, producing high yields under marginal conditions. Sweetpotato yields differ, from  
54 over 25 metric tons per hectare with high-input to below 3 metric tons per hectare when grown  
55 as a subsistence crop with minimal input (Ling et al. 2010). In Kenya, sweetpotato production is  
56 hindered by numerous biotic, abiotic and social factors (Kivuva et al. 2015). Pests and diseases  
57 are the greatest limitation that affect production and reduce yields (Motsa et al. 2015). Viral  
58 diseases are the greatest threat to sweetpotato production, causing yield losses of up to 80%  
59 (Gibson and Kreuze, 2015).

60

61 Recycling of vine cuttings leads to a significant decline in root yield and quality due to virus  
62 accumulation. Sweetpotato virus disease (SPVD), caused by dual infection of a Potyvirus, sweet  
63 potato feathery mottle virus (SPFMV), and a Crinivirus, sweetpotato chlorotic stunt virus  
64 (SPCSV), is most devastating in East Africa (Karyeija et al. 1998; Gibson et al. 1997). SPFMV  
65 is common in sweetpotato producing regions around the world (Ateka et al. 2004). SPCSV  
66 induces synergistic interactions with other sweetpotato viruses belonging to the species  
67 sweetpotato mild mottle virus (SPMMV) (Tairo et al. 2005), sweetpotato virus G (SPVG) (IsHak  
68 et al. 2003), and cucumber mosaic virus (CMV) (Cohen and Loebenstein, 1991). However, yield  
69 decline attributable to these viruses is cultivar dependent and previous studies have given  
70 contradictory findings. Milgram et al. (1996) and Clark and Hoy (2006), reported that single  
71 infection with SPFMV, SPVG, or isolates of the species sweetpotato virus 2 (syn. *Ipomoea vein*  
72 *mosaic virus*) did not considerably affect yield. In the contrary, Gutierrez et al. (2003) found that  
73 SPFMV-infected plants produced better yield than the healthy control. On the other hand,  
74 Gibson et al. (1997), Mukasa (2004), Njeru et al. (2004), Domola et al. (2008), reported yield  
75 reduction of up to 46%.

76 To date, over 30 viruses have been characterized as pathogens of sweetpotato, half of them  
77 belonging to the families *Geminiviridae* and *Caulimoviridae* (Clark et al. 2012). Members of the  
78 species sweet potato leaf curl virus (SPLCV) and related viruses infecting sweetpotato, belong to  
79 the genus *begomovirus* in the family *Geminiviridae*. They are highly variable making their  
80 taxonomy, which has been revised over recent years, problematic, but they can be distinguished  
81 from begomoviruses infecting other crops by their phylogenetically unique lineage, referred to as  
82 sweepoviruses (Albuquerque et al. 2012; Esterhuizen et al. 2012; Fauquet and Stanley, 2003;  
83 Wasswa et al. 2011, Cuellar et al. 2015). We will refer to them as such in this manuscript when  
84 discussing them in general, rather than individual isolates. Sweepoviruses are transmitted  
85 through vegetative propagation and semi-persistently by whiteflies (*Bemisia tabaci*). They have  
86 been isolated from sweetpotato fields in different parts of the world including the United States,  
87 South America, the Middle East, Southeast Asia, and East Africa (Briddon et al. 2006; Luan et  
88 al. 2006; Miano et al. 2006; Prasanth and Hegde 2008; Lozano et al. 2009; Paprotka et al. 2010;  
89 Albuquerque et al. 2012; Wasswa et al. 2011). Sweepovirus infected plants may exhibit upward  
90 curling and/or rolling of leaves, vein swelling, and vein mottle in young sweetpotato plants.

91 However, symptom remission is observed in mature plants, and most plants become  
92 symptomless (Miano et al. 2006). Sweepovirus single viral infections often lack obvious  
93 symptoms making it difficult to be recognized by growers. Miano et al. (2006) reported the  
94 occurrence of sweepoviruses in an agricultural field station in Kenya. Countrywide surveys  
95 conducted in 2011 (Maina, 2014; Maina et al. 2017) and (Wanjala, 2016/2017 - *unpublished*  
96 *data*) confirmed sweepoviruses to be present in the major sweetpotato growing regions of the  
97 country. The presence of sweepovirus inoculum in major sweetpotato producing areas in Kenya  
98 and the continuing expansion of the vector - *Bemisia tabaci* (Simmons et al. 2008) might have  
99 contributed to its broad geographic distribution in Kenya.

100 Despite the lack of characteristic foliar symptoms, sweepoviruses have been reported to cause  
101 between 10 and 80% yield loss for different sweet potato cultivars (Clark and Hoy 2006; Ling et  
102 al. 2010; Gibson and Kreuze, 2015). Studies have demonstrated that sweepoviruses when co-  
103 infected with SPCSV can lead to increased viral titres and symptoms in sweetpotatoes under  
104 controlled conditions (Cuellar et al. 2015). However, limited knowledge exists on the interaction  
105 of sweepoviruses, SPFMV and SPCSV in sweetpotato under field conditions or their effect on  
106 yield and quality of sweetpotato roots. Therefore, the study aimed at evaluating the effect of  
107 Kenyan isolates of a sweepovirus (SPLCV), SPFMV, and SPCSV alone, and co-infections on  
108 sweetpotato root yield of two cultivars contrasting in their resistance to SPVD.

109

## 110 **Methods and Materials**

### 111 **Sources of healthy planting and detection of sweetpotato viruses**

112

113 Clean virus tested (VT) *in vitro* planting materials were obtained from the International Potato  
114 Centre (CIP) germplasm collection at Kenya Plant Health Inspectorate Services - Plant  
115 Quarantine and Biosecurity Station (KEPHIS-PQBS) Muguga, Kenya. Plantlets of varieties  
116 'Kakamega' and 'Ejumula' were hardened in insect proof greenhouses and away from plants that  
117 might be infected with viruses. Both cultivars are landraces, widely adaptable, have good storage  
118 root shapes if grown in light soils, high dry matter content, and excellent consumer acceptance,

119 especially among children and women (Mwanga et al. 2007). Ejumula is susceptible to SPVD  
120 while Kakamega shows levels of field resistance to sweetpotato virus disease.

121 Biological indexing was carried out as described by Dennien et al. (2013) on *Ipomoea setosa*  
122 (indicator plant) that is highly sensitive to most sweetpotato infecting viruses. Vines singly  
123 infected with SPFMV, SPFMV and SPLCV were used as scions to an *Ipomoea setosa* stock  
124 seedling following the procedures in (Beetham and Mason 1992 and Dennien et al. 2013). Virus  
125 infection treatments (T1–T16) are described in Table 1. *I. setosa* seedling was grown out to 10  
126 nodes (4-6 weeks after planting) and grafted with 2 two-node scions from the test plant, one from  
127 the basal portion of the vine and one from near the apex of the vine. A wedge graft was made at  
128 about 3 nodes above the cotyledonary node and a side veneer graft just below the cotyledonary  
129 node. Grafted plants in the pots were covered with plastic bags and placed into large, shallow  
130 trays lined with plastic sheeting. The *I. setosa* indicator plant was allowed to grow. To capture  
131 transient symptoms, indicator plants are observed twice weekly until 21 days post grafting (PG),  
132 then weekly until 42 days PG. The *I. setosa* was cut back above the graft site and allowed to  
133 regrow for an additional 3-4 weeks, continually observing for symptom development. Symptoms  
134 typical of different viruses as illustrated in Clark et al., 2012 and Dennien et al., 2013 were  
135 recorded.

136 A standard Nitrocellulose membrane enzyme-linked immunosorbent assay (NCM- ELISA) was  
137 done using a test kit manufactured by the International Potato Center and as and described by  
138 Dennien et al (2013). It tests for 10 known sweetpotato infecting viruses: (C-6, CMV, SPCaLV,  
139 SPCV, SPCFV, SPCSV, SPFMV, SPLV, SPMMV, SPMSV and SPVG). It is a prerequisite for  
140 the test to use material that is first grafted onto *I. setosa*. This increases the virus concentration in  
141 the indicator and prevents inhibitors present in sweetpotato sap. There are no antisera available  
142 for SPLCV and sweepoviruses were tested by PCR as described by Li et al. (2004); using  
143 Sweepovirus-specific primers SPG1 (5'-CCC CKG TGC GWR AAT CCA T-3') and SPG2 (5'-  
144 ATC CVA AYW TYC AGG GAG CTA A-3'), designed to amplify a 901-bp region  
145 encompassing partial AC1 and AC2 open reading frames (ORFs).

#### 146 **Source of virus inoculum and virus inoculation**

147 Plants singly infected with SPCSV (isolate KE\_4) and SPFMV (isolate KE\_42). used for graft  
148 infection were obtained from KEPHIS-PQBS. Sweepovirus (SPLCV) isolate KE\_97 positive  
149 plants were collected in different parts of Kenya during surveillance surveys. Viruses were  
150 confirmed by grafting to *I. setosa* and use of NCM ELISA. In addition, the plants were subjected  
151 to screening by PCR for begomovirus as described above by Li et al. (2004). SPCSV and  
152 SPFMV were tested with Reverse Transcription PCR (RT-PCR) as described by Kwak et al.  
153 (2014). Furthermore, local strains of sweepovirus positive samples were confirmed by Sanger  
154 sequencing of the PCR product (GenBank id MN122257) and confirmed isolate KE\_97 was a  
155 sweepovirus most closely related to SPLCV and we will refer to it as SPLCV from here  
156 onwards. Two-node cuttings were obtained from the VT hardened mother plants of ‘Kakamega’  
157 and ‘Ejumula’ and established in a three-liter pot: 17 cm diameter and 20 cm height. Media  
158 consisted of sterile top forest soil: cow manure: gravel at a ratio of 5:2:1. Plants were grown in  
159 the greenhouse at an average temperature of 28° C and watered as needed. After one month when  
160 the plants were ~30 cm tall, 20 plants were graft-infected with 5 cm stem scion using side-veneer  
161 procedure (Hartmann et al. 1997) on both ‘Ejumula’ and ‘Kakamega’. **Table 1** shows the  
162 different combinations of virus infections with SPLCV, SPFMV, and SPCSV, alone and in  
163 possible dual combinations used as treatments in this study. Different treatments were kept in  
164 separate insect-proof chambers in the greenhouse to avoid cross-infection.

165

## 166 **Greenhouse multiplication of planting material inoculated with viruses**

167 The different treatments (T1–T16 described in **Table 1**) were tested at three months after  
168 inoculation, by Quantitative Reverse Transcription PCR (qRT-PCR) to confirm the  
169 presence/absence of SPFMV, SPCSV and SPLCV. qRT-PCR reactions were carried out as  
170 described by Cuellar et al. (2015), for SPFMV the primers 5'-CGC ATA ATC GGT TGT TTG  
171 GTT T-3' and 5'-TTC CTA AGA GGT TAT GTA TAT TTC TAG TAA CAT CAG-3', and the  
172 probe 5'-[6-FAM]-AAC GTC TCC ACG CAA GAA GAG GAT GC-[TAMRA]-3' were used  
173 corresponding to the coat protein region of the genome. For SPLCV the primers 5'-GAG ACA  
174 GCT ATC GTG CC-3' and 5'-GAA ACC GGG ACA TAG CTT CG-3', and the probe 5'-6FAM-  
175 TAC ACT GGG AAT GCT GTC CCA ATT GCT-TAMRA-3' were used corresponding to ACI

176 fragment of coat protein as described by Ling et al. (2010). Plants that tested positive as expected  
177 were rapidly multiplied in seedling trays to generate enough material for field trials. During  
178 multiplication, a new sterile scalpel blade was used to cut scions to avoid cross contamination  
179 between treatments. To ensure that adequate planting material was available for field  
180 experiments, plants with double/multiple viruses were multiplied in extra trays due to  
181 slow/stunted growth. The multiplied planting material was further randomly tested by qRT-PCR  
182 to confirm their infection status before planting in the field.

183

### 184 **Field experimental design**

185 Field trials were conducted for two seasons at the Kenya Agricultural and Livestock Research  
186 Organization, Kiboko Centre, Makueni County in Kenya. The Centre is situated at Latitude S 02  
187 ° 12.781', longitude E 037 ° 43.078' and 931 meters above sea level. The soils were sandy loams  
188 for each trial in both seasons. Mean annual rainfall in the region is 50 mm with mean monthly  
189 maximum temperature of 33 °C. The two seasons of planting were three months apart. The first  
190 field trial was established in September 2017 to February 2018 while season II was set up in  
191 December 2017 to May 2018. Both trials were laid using a randomized complete block design  
192 (RCBD) with three replicates for the sixteen treatments. The land was ploughed, harrowed and  
193 ridges prepared by hand at the two sites before planting. Each replicate (plot) comprised 40  
194 plants at inter and intra-row spacing of 1 m and 0.3 m, respectively. Vine cuttings were four  
195 weeks old (~ 30 cm long) at the time of planting. Plants were watered immediately after planting  
196 and watered by overhead irrigation for 3 hours at night every four days. Weeding was done  
197 manually using hand hoes twice a month in the first two months and once thereafter until the  
198 crop was harvested. Two rows of finger millet were planted between each plot to reduce spread  
199 of viruses between plots by insect vectors. To monitor whitefly abundance, a yellow sticky card  
200 trap (26 cm<sup>2</sup>) was placed horizontally at canopy height at the center of each plot. These were  
201 replaced after every two month. To minimize further spread of viruses between plots; plants  
202 were sprayed fortnightly by alternating systemic and contact insecticide as described by  
203 manufacturer on the container product label.

## 204 **Evaluation of SPLCV, SPFMV and SPCSV under field conditions.**

205 Disease symptom evaluation was done at 30, 90 and 120 days after planting as described by  
206 Hahn et al. (1981). A severity score of 1–5 was used, where 1 = plants showing no symptoms; 2  
207 = virus symptoms just starting to appear and this can be as mild chlorotic spots on the older  
208 leaves or mild vein clearing or mild purpling at the leaf margin of mature leaf; 3 = the symptoms  
209 in 2 enlarge and become more visible; 4 = infected plants showing severe disease symptoms  
210 including leaf purpling, leaf chlorosis and leaf shape starts to get distorted; and 5 = infected  
211 plants showing very severe virus disease symptoms including total distortion in leaf shape,  
212 stunted growth, mosaic, leaf chlorosis and sometimes complete death of an infected plant. At the  
213 end of both growing seasons, cross contamination between plots was evaluated by testing with  
214 RT-PCR. Three leaves (third/fifth/seventh) were collected from ten plants in the inner middle  
215 rows, placed between filter papers and put in a ziplock bag with silica gel. Silica gel was  
216 changed several times when the color changed from blue to pink to ensure that the leaves were  
217 well desiccated. Samples were pooled into one per plot and tested for SPCSV, SPFMV (RT-  
218 PCR) and SPLCV (PCR) as described above to check if any cross contamination of viruses had  
219 occurred between plots.

220

## 221 **Root yield assessment**

222 Plants were harvested at 150 days after planting (DAP); 15 February 2018 and 15 May 2018,  
223 respectively. Storage roots were graded as marketable (good-quality roots of 100–1200 g) or  
224 unmarketable (<100 g). Sixteen parameters were collected during the experiment. These  
225 included: disease severity, main branches length (cm), vine vigor (rate of shoot growth -vine  
226 strength, diameter and internode length) - Gruneberg et al. (2010), weight of vines per plot (Kg),  
227 number root per plant, number marketable storage roots, number non-marketable storage roots,  
228 weight marketable storage roots (Kg), number non-marketable storage roots (Kg), total Root  
229 yield (t ha<sup>-1</sup>), marketable root yield (t ha<sup>-1</sup>), foliage yield (t ha<sup>-1</sup>), % of commercial root yield, ratio  
230 root length/diameter, root dry matter content (%) and harvest index (HI).

231



## 232 **Statistical analysis**

233 The GLM procedure in SAS (ver. 9.1; SAS Institute Inc., Cary, NC) was used for analysis of  
234 variance. The two season data were analyzed and are presented separately and combine means  
235 for the two seasons. Separation of means was achieved by Tukey's Studentized Range Test. In  
236 addition, analysis of variance was used to test for differences between treatments and treatment  
237 means were separated by Fisher's protected t-test least significant difference by GenStat (2003).  
238 Further, PCA and Pearson correlation coefficients showing pair-wise associations of traits for  
239 yield and yield contributing characters was generated by XLSTAT to show the relationship of  
240 key parameters measured and treatments.

241

## 242 **Results**

### 243 **Symptom expression and virus detection in single or mixed infection by SPFMV, SPCSV** 244 **and SPLCV under field conditions**

245 Analysis of variance for disease severity taken at 90 day after planting showed a significant (*F*  
246 *pr.* <.001) interaction between virus treatments for both 'Ejumula' and 'Kakamega' for the two  
247 seasons as shown in **Table 2** and **Figure 1**. 'Ejumula' was more severely affected than  
248 'Kakamega' for the different virus treatments. Uninfected control treatments for 'Ejumula' and  
249 'Kakamega' respectively, did not display symptoms compared to virus-infected treatments.  
250 Disease severity scores in both seasons differed among treatments. SPLCV infected plants  
251 produced mild symptoms in the two varieties used in this study (**Fig 2A & 3A**). Plants exhibited  
252 slight rugosity and upward curling or rolling of leaves. Disease severity due to SPCSV and  
253 SPFMV alone was appreciable in both cultivars and both seasons. Uninfected controls were  
254 symptomless (**Fig 2B & 3B**). Purple rings characterized the symptom expression due to SPFMV  
255 (**Fig 2C & 3C**). SPCSV displayed purpling on older leaves (**Fig 2E & 3E**). A combination of  
256 SPCSV+ SPLCV had a more pronounced severity in both seasons on 'Ejumula' - showing  
257 chlorotic spots and rugosity; while it was less severe for 'Kakamega' - showing purpling of older  
258 leaves and upward curling (**Fig 2D & 3D**). SPVD and SPVD+SPLCV were the most severe for  
259 both seasons. These included: vein chlorosis, purple spots, mosaic, leaf narrowing, deformation

260 and stunted growth (**Fig 2F & 3F**). Worth noting was that symptom severity declined at 120  
261 DAP in both seasons. RT-PCR/PCR tests performed from bulk samples at the end of the  
262 experiment just before harvest indicated the following plots were contaminated with viruses with  
263 which they had not been pre-inoculated: ‘Ejumula’- 17 (contaminated by SPLCV), ‘Kakamega’ -  
264 24 (contaminated by SPCSV), Kakamega - 18 (contaminated by SPFMV), in season I and  
265 ‘Kakamega’ - 18 (contaminated by SPCSV) in season II (**Table 1**). Because tests were done on  
266 bulks, we were unable to determine the extent of contamination, but considering the overall low  
267 level of cross-plot contamination observed in bulk testing we assume it was limited to no more  
268 than one or two plants/bulk. We could not ascertain the mechanisms of infection for the specific  
269 plots, time of infection and if the infection contributed to yield loss. However, as there was no  
270 statistically significant difference with the other replicates for the same treatment and symptoms  
271 corresponding to those of the contaminating viruses were also not obvious in these plots, we  
272 assume they responded to few and late season infections that had minimal impact on plant  
273 performance and this was thus not considered during analysis. As no wild *Ipomoea* or  
274 sweetpotato fields were present at or near the field trial plots, the source of virus contamination  
275 was most likely from adjacent plots.

276

### 277 **Effects of virus infection on total root yield.**

278 Season I resulted in a greater yield and storage root number (**Supplementary Table 1**) than  
279 season II, despite symptoms being generally milder (**Supplementary Table 2**). Significant  
280 differences ( $F_{pr} < .001$ ) were detected, among treatments for root yield related traits (the number  
281 of roots per plant, number marketable storage roots, total storage root yield ( $t\ ha^{-1}$ ) and ratio root  
282 length: diameter) **Table 2**. Analysis demonstrated that total root yield differed significantly for  
283 different treatments, variety and season. Uninfected control treatments for ‘Ejumula’ and  
284 ‘Kakamega’ respectively gave a higher storage root yield ( $t\ ha^{-1}$ ) compared to the different virus  
285 treatment as shown in **Figure 4**. ‘Kakamega’ infected with SPLCV or all three viruses had a  
286 significant yield reduction of 47% and 35% respectively. ‘Kakamega’ infected with other single  
287 or and multiple viruses gave lesser yield reductions ranging from 6% (SPFMV or  
288 SPFMV+SPLCV) to 29% (combinations with SPCSV) but were not significant compared to the

289 control. Contrary, there was no yield reduction for ‘Ejumula’ infected with SPLCV alone.  
290 However, ‘Ejumula’ infected with all other combinations gave significant yield reduction  
291 ranging from 25 – 44 % compared to the uninfected control (**Table 2**). Significant differences ( $F$   
292  $pr.<.001$ ) in the ratio root length to diameter, the number of non-marketable roots were observed  
293 for some of the different virus treatments. A consistent observation was evident from the virus  
294 infected treatments with SPLCV (singly or in combination with SPFMV and or with SPCSV)  
295 that produced a high number of fibrous roots compared to the uninfected control treatment  
296 (**Supplementary Figure 1**).

297

### 298 **Yield component traits correlation with the total storage root yield**

299 Yield component traits evaluated for yield and yield contributing characters showed a significant  
300 correlation. As observed in **Table 3** total storage root yield ( $t\ ha^{-1}$ ) had strong significant positive  
301 association with vine vigor (0.654), marketable storage root yield ( $t\ ha^{-1}$ ) (0.910), % commercial  
302 roots (0.525) and harvest index (0.536). Foliage yield ( $t\ ha^{-1}$ ) (0.485) and the number of roots per  
303 plant (0.338) recorded a relatively strong but non-significant positive association. Contrary, a  
304 negative association was observed between total storage root yield and severity at (- 0.605). In  
305 addition, ratio root length to diameter (- 0.387) and the number of non-marketable roots (- 0.337)  
306 was negatively correlated with severity, though not significant. The results of the correlation  
307 biplot (CB) (**Figure 5**), supports an association of significant correlated traits for yield and yield  
308 contributing characters. Sweetpotato yield parameters varied substantially under the virus  
309 treatments, and for both varieties. Total storage root yield ( $t\ ha^{-1}$ ), vine vigor, marketable storage  
310 root yield ( $t\ ha^{-1}$ ), % commercial roots, harvest index, foliage yield ( $t\ ha^{-1}$ ) and the number of  
311 roots per plant displayed furthest away from the center, were most important to distinguish the  
312 virus treatments. The PCA, further shows the association of variables (yield parameters) and  
313 virus treatments with PCA factor scores in terms of response for the treatments. Uninoculated  
314 treatments for ‘Ejumula’ and ‘Kakamega’ had the highest storage root yield ( $t\ ha^{-1}$ ). Contrary,  
315 treatments for ‘Ejumula’ and ‘Kakamega’ respectively infected with SPVD+SPLCV were  
316 associated with the highest severity scores.

317

## 318 **Discussion**

319 Sweepviruses have increasingly been reported from throughout the world. Despite showing few  
320 symptoms; increasingly studies are reporting them to have varying but significant impact on root  
321 yields. However, until only very recently (Mulabisana et al., 2019), there had been no reports on  
322 their impact on African sweetpotato varieties, and this is the first report of their effect on East-  
323 African varieties released from local land-races. We show that SPLCV infected plants produced  
324 mild symptoms in both varieties used in this study, which however tended to disappear as plants  
325 matured. This expands on earlier investigations that reported lack of any symptoms in SPLCV  
326 infected plants (Ling et al. 2010; Lotrakul et al. 2003). Similarly, Mulabisana et al. (2019)  
327 recently reported mild to no symptoms depending on varieties infected with two different  
328 sweepviruses whereas Cuellar et al. (2015) demonstrated the effect of virus isolates and plant  
329 age on symptom expressions and virus titres. Thus, sweepvirus symptomatology can vary  
330 depending on cultivar and virus strain and plant age, but invariably is mild and often absent.

331

332 Results from our trials show that differences in root yield from SPLCV infected sweetpotato  
333 were not significantly different from the uninfected treatments for Ejumula for the two seasons.  
334 Contrary, Kakamega had a significant yield reduction following single infection with SPLCV.  
335 This illustrates varietal differences in response to sweepvirus infection as found by previous  
336 studies, reporting yield reductions between 10-94% between different varieties (Clark and Hoy,  
337 2006, Ling et al. 2010, Mulabisana et al. 2019). Notable findings compared to previous studies  
338 were the clear difference in susceptibility to SPLCV between the two cultivars used in our  
339 experiments, where 'Ejumula' which is relatively susceptible to SPFMV and SPCSV appeared  
340 insensitive to SPLCV and 'Kakamega' which was more resistant to SPFMV and SPCSV was  
341 highly sensitive to SPLCV. This result thus highlights resistance to SPVD and SPLCV (and  
342 likely other sweepviruses) are not necessarily linked. Furthermore, yield losses and symptoms  
343 caused by co-infections of SPLCV with SPFMV, SPCSV or both viruses were not significantly  
344 different from those caused by the most severe virus in the combination by itself, suggesting a  
345 lack of synergistic and limited additive effect of the viruses on yield losses.

346

347 SPCSV is considered the most damaging virus of sweetpotato due to its ability to induce  
348 synergistic viral diseases with several other viruses (Kim et al. 2017), principal and most severe  
349 of which is co-infection with SPFMV, causing SPVD. By itself SPCSV may cause mild to  
350 severe symptoms of yellowing or reddening of older leaves, which can often be confused with  
351 nutritional deficiencies (Untiveros et al. 2007). Corresponding to the level of resistance of the  
352 varieties, single infection by SPCSV induced pronounced symptoms in ‘Ejumula’ (considered  
353 susceptible) and produced milder symptoms in ‘Kakamega’ (considered tolerant) and led to yield  
354 losses of 38% and 24% on average over both seasons respectively. Co-infection with SPFMV  
355 increased symptom severity and yield loss in both cultivars. In ‘Ejumula’ yield losses were  
356 significantly different between plants infected by SPFMV, SPCSV or both viruses, whereas in  
357 ‘Kakamega’ the yield loss between SPCSV, SPFMV, and co-infected plants was identical. This  
358 contrasts with most previous reports where more severe yield reductions (from 60-95%) were  
359 found when plants co-infected by SPCSV and SPFMV (Milgram et al. 1996; Gibson 1998 and  
360 Gutierrez et al. 2003) and may be a result of the specific virus strains and/or varieties used in the  
361 current experiment. Further infection of SPLCV in combination with SPFMV and SPCSV, led to  
362 slightly higher (non-significant) yield reductions compared to SPFMV and SPCSV alone in both  
363 cultivars.

364 Gutierrez et al. (2003) and Tugume et al. (2013), reported that SPFMV-infected Jonathan and  
365 Constanero varieties did not show foliage symptoms under field conditions. Nevertheless, typical  
366 symptoms associated with SPFMV were observed in the current study and also by Mulabisana et  
367 al. (2019). However, as with SPLCV, a reduction of symptoms was observed in SPFMV  
368 infected plants as they matured and most plants became symptomless after 16 weeks. This  
369 phenomenon has been reviewed by Gibson and Kreuze (2015) who reported that popular East  
370 African cultivars appear to sustain their long-term survival by reverting to symptomless infection  
371 and even becoming virus free in some occasions. In our trials, SPFMV by itself had a significant  
372 yield impact on ‘Ejumula’, whereas ‘Kakamega’ was not affected, which is in concordance with  
373 their level of resistance. Previous investigations have also presented contradictory conclusions  
374 regarding yield reductions by single SPFMV infections. Milgram et al. (1996) and, Clark and  
375 Hoy (2006) and Gutierrez et al. (2003), noted that single infection with SPFMV did not greatly  
376 affect yield. On the other hand, yield reduction of up to 46% were reported in other studies  
377 (Gibson et al. 1997; Mukasa 2004; Njeru et al. 2004 and Domola et al. 2008), and recently,

378 Mulabisana et al. (2019) reported reductions of 27-92% by single infection with SPFMV across  
379 12 different cultivars in field trials in South Africa with notable between season effects. Thus, as  
380 in the case of sweepoviruses and SPCSV, the impact of SPFMV single infection on yield seem to  
381 be highly cultivar specific and across all cultivars globally may be higher than previously  
382 assumed. Gibson and Kreuze (2015), have comprehensively documented previous work on yield  
383 reductions reported by treatments and cultivars.

384 Previous investigations have documented that yield and quality of storage roots are sensitive to  
385 environmental variations: from year to year, field to field, and even within the same field  
386 (Collins et al. 1987; Ngeve and Bouwkamp, 1993 and Bryan et al. 2003). Yield variation among  
387 treatments and seasons could be attributed to climatic factors like rainfall and temperature  
388 (Roitsch et al. 2003). In season II, we experienced a fourfold increase in rainfall compared to  
389 season I (**Supplementary Figure 2**), but no significant difference in temperatures. Sweetpotato  
390 is sensitive to water logging and too much water, specifically early in the growing season, could  
391 have led to a lower yield than the first season.

392

393 Principal component analysis (PCA) biplot, supports an association of significant correlated  
394 traits for yield and help identify yield contributing characters. Furthermore, it shows the  
395 relationship of variables (yield and yield contributing traits) and observation (virus treatments)  
396 scores, with PCA factor scores in terms of response for the treatments. For instance,  
397 uninoculated treatments for var. Ejumula and Kakamega had the highest storage root yield (t ha<sup>-1</sup>)  
398 <sup>1</sup>). Contrary, treatments inoculated with SPVD+SPLCV for 'Ejumula' and 'Kakamega' were  
399 associated with the highest severity scores and low root yield. Understanding interrelationships  
400 among various yield and yield contributing characters is important and can be utilized by  
401 breeders when evaluating for virus tolerant varieties during selection.

402 The highest negative and significant association existed between total storage root yield and  
403 disease severity, in both varieties. Gurmu et al. (2015), described a negative correlation between  
404 virus symptoms and root yield and is consistent with present results. SPVD is a damaging  
405 disease complex of sweetpotato and the negative correlation observed between fresh root yield  
406 and disease severity was expected. In addition, ratio root length to diameter, the number of non-

407 marketable roots were negatively correlated to root yield, though not significant. These findings  
408 corroborate Bryan et al. (2003) who noted that virus infected planting material produced storage  
409 roots with a high length/diameter ratio, culminating in lower total yield and root quality.

410

## 411 **Conclusions**

412 Our study confirmed the relative susceptibility to SPVD of ‘Ejumula’, and revealed it expressed  
413 equal sensitivity to both viruses. The relatively SPVD tolerant phenotype of ‘Kakamega’, was  
414 expressed as reduced symptoms and absence of yield penalties upon SPFMV infection and  
415 reduced symptoms and yield losses upon SPCSV infection as compared to ‘Ejumula’. On the  
416 other hand, in contrast to other studies and despite the obvious enhancement of symptoms in  
417 SPVD affected plants of both cultivars, we found no evidence of synergistic yield reductions as  
418 compared to single infections and suggests that symptoms may not always be an adequate  
419 indicator for the effect on yield. This was also clearly the case for SPLCV infection. Considering  
420 the widespread presence of begomoviruses globally and also in Africa, this suggests that  
421 breeders need to take into account these viruses when selecting for SPVD resistance, as they may  
422 inadvertently be selecting for sweepovirus susceptibility by ignoring them. Nevertheless, even in  
423 ‘Kakamega’, SPLCV infections induced only mild symptoms that disappeared over time, making  
424 such plants difficult to identify to farmers, seed producers and breeders alike to implement any  
425 control methods. Thus, adequate diagnostic tests are needed to support these efforts. No effective  
426 antisera are available for sweepoviruses and the PCR tests used in this study are too cumbersome  
427 for routine implementation in breeding programs or seed certification systems. An effort into  
428 developing easier to use molecular diagnostics for sweepoviruses based on isothermal  
429 amplifications systems is recommended to support these efforts.

430 On the other hand, although only one sweepovirus isolate was used in this study, we know from  
431 previous studies that this group of viruses is hugely variable and that different isolates differ in  
432 their ability to provoke symptoms in sweetpotatoes and indicator plants and accumulate at  
433 different titres (Cuellar et al., 2015). Important questions that remain to be answered are if  
434 different isolates/species differ in their impact on sweetpotato root yield, if this can be correlated  
435 to any particular characteristics other than symptoms (such as virus titres) and if resistance of

436 sweetpotatoes to one of them is correlated with resistance to other isolates. Thus, immediately  
437 relevant research topics include evaluating the extent of sweepvirus infections as well as the  
438 virus variability in farmers fields in Kenya and Africa in general and the susceptibility to these  
439 viruses of current sweetpotato varieties, particularly those selected for resistance to the more  
440 visible SPVD.

#### 441 **Competing interests**

442 The authors declare that they have no competing interests.

443

#### 444 **Author Contributions**

445

446 **Conceptualization:** Jan F. Kreuze, Jan W. Low.

447 **Data curation:** Bramwel W. Wanjala.

448 **Formal analysis:** Bramwel W. Wanjala.

449 **Investigation:** Bramwel W. Wanjala, Elijah M. Ateka, Jan F. Kreuze, Douglas W. Miano.

450 **Methodology:** Bramwel W. Wanjala, Elijah M. Ateka, Jan F. Kreuze, Douglas W. Miano

451 **Resources:** Jan W. Low.

452 **Validation:** Elijah M. Ateka, Jan F. Kreuze, Douglas W. Miano

453 **Writing - original draft:** Bramwel W. Wanjala.

454 **Writing - review & editing:** Bramwel W. Wanjala, Elijah M. Ateka, Jan F. Kreuze, Douglas W.  
455 Miano and Jan W. Low. All authors read and approved the final manuscript.

456



## 457 **Acknowledgement**

458 The International Potato Center (CIP) funded this study through the Sweet potato Action for  
459 Security and Health in Africa (SASHA) project and was undertaken as part of the CGIAR  
460 Research Program on Roots, Tubers and Bananas (RTB). The authors specially appreciate  
461 the Kenya Plant Health Inspectorate Services–Plant Quarantine and biosecurity Station  
462 (KEPHIS-PQBS) Muguga for Laboratory and screenhouse facilities where diagnostic assays and  
463 propagation of planting material was conducted. Thanks to the Director General, Kenya  
464 Agricultural and Livestock Research Organisation (KALRO) for granting study leave to the first  
465 author. We highly appreciate provision of land for undertaking field work. We are grateful to Dr.  
466 Daniel Pande for reviewing the draft manuscript. This work is part of a PhD research study by  
467 the first author.

## 468 **Literature cited**

- 469 Albuquerque, L. C., Inoue-Nagata, A. K., Pinheiro, B., Resende, R. O., Moriones, E., and Navas-  
470 Castillo, J. 2012. Genetic diversity and recombination analysis of 9 sweepviruses from Brazil.  
471 *Virol. J.*, 241.
- 472
- 473 Ateka, E.M., Njeru, R.W., Kibaru, A.G., Kimenju, J.W., Barg, E., Gibson, R.W., and Vetten,  
474 H.J. 2004. Identification and distribution of viruses infecting sweetpotato in Kenya. *Ann Appl*  
475 *Biol* 144: 371–379.
- 476
- 477 Beetham, P., and Mason, A.1992. Production of pathogen-tested sweet potato. Australian Centre  
478 for International Agricultural Research.
- 479
- 480 Briddon, R.W., Bull, S.E., and Bedford, I.D. 2006. Occurrence of Sweet potato leaf curl virus in  
481 Sicily. *Plant Pathol.* p. 55, 286.
- 482
- 483 Bryan, A.D., Pesic-Van Esbroeck Z, Schultheis, J.R., Pecota, K.V., Swallow, W.H., and  
484 Yench, G.C. 2003. Cultivar decline in sweetpotato: I. Impact of micropropagation on yield,  
485 storage root quality, and virus incidence in ‘Beauregard’. *Journal of the American Society of*  
486 *Horticultural Science*, 128, 846–55.
- 487
- 488
- 489
- 490 Clark, C.A., and Hoy, M.W. 2006. Effects of common viruses on yield and quality of  
491 Beauregard sweetpotato in Louisiana. *Plant Disease* 90,83–8.
- 492

- 493 Clark, C. A., Davis, J. A., Abad, J. A., Cuellar, W. J., Fuentes, S., Kreuze, J. F., Gibson, R. W.,  
494 Mukasa, S. B., Tugume, A. K., Tairo, F. D., and Valkonen, J. P. T. 2012. Sweetpotato Viruses:  
495 15 Years of Progress on Understanding and Managing Complex Diseases. *Plant Dis.*,96, 168-  
496 185.
- 497
- 498 Cohen, J., and Loebenstein, G. 1991. Role of a whitefly-transmitted agent in infection of  
499 sweetpotato by cucumber mosaic virus. *Plant Dis.*72,583-585.
- 500
- 501 Collins, W. W., Wilson, L. G., Arrendell, S., and Dickey, L. F. 1987. Genotype × environment  
502 interactions in sweetpotato yield and quality factors. *J. Am. Soc. Hortic. Sci.* 112:579-583.
- 503
- 504 Cuellar, W. J., Galvez, M., Fuentes, S., Tugume, J., and Kreuze, J. 2015. Synergistic interactions  
505 of Begomoviruses with sweetpotato chlorotic stunt virus (genus Crinivirus) in sweetpotato  
506 (*Ipomoea batatas* L.). *Mol. Plant Pathol.* 16, 459–471.
- 507
- 508 Dennien,S., Homare, D., Hughes, M., Lovatt, J., Coleman,E., Jackson, G., 2013. Growing  
509 healthy sweetpotato: best practices for producing planting material, ACIAR Monograph No. 153.  
510 Australian Centre for International Agricultural Research, Canberra.
- 511
- 512
- 513 Domola, M.J., Thompson, G.J., Aveling, T.A.S, Laurie, S.M., and Strydom, H. van den Berg.  
514 2008. Sweetpotato viruses in South Africa and the effect of viral infection on storage root yield.  
515 *African Plant Protection* 14: 15–23.
- 516
- 517 Esterhuizen, L. L., Heerden, S. W., Rey, M. E. C., and Heerden, H. 2012. Genetic identification  
518 of two sweet-potato-infecting begomoviruses in South Africa. *Arch. Virol.*, 157, 2241-2245.
- 519
- 520 Fauquet, C. M., and Stanley, J. 2003. Geminivirus classification and nomenclature: progress and  
521 problems. *Ann. Appl. Biol.*, 142, 165-189.
- 522
- 523 Gibson, R.W., Mwanga, R.O.M., Kasule, S., Mpembe, I., and Carey, E.E. 1997. Apparent  
524 absence of viruses in most symptomless field-grown sweetpotato in Uganda. *Ann.*  
525 *Appl.Biol.*130,481-490.
- 526
- 527 Gibson, R.W., Kaitisha, G.C., Randrianaivoarivony, J.M., and Vetten, H.J. 1998. Identification  
528 of the East African strain of sweetpotato chlorotic stunt virus as a major component of sweet  
529 potato virus disease in southern Africa. *Plant Dis.* 82, 1063.
- 530
- 531 Gibson, R.W., Aritua, V., Byamukama. E., Mpembe, I., and Kayongo, J. 2004. Control strategies  
532 for sweet potato virus disease in Africa. *Virus Research* 100, 115–22.

- 533  
534 Gibson, R.W., and Kreuze, J. F. 2015. Degeneration in sweetpotato due to viruses, virus-cleaned  
535 planting material and reversion: A review. *Plant Pathology* 64:1-15.  
536
- 537 Gurmu, F., Hussein, S., and Laing, M. 2015. The potential of orange-fleshed sweetpotato to  
538 prevent vitamin A deficiency in Africa. *Int J Vitamin Nutr Res.* 84:65–78.
- 539 Gutierrez, D.L., Fuentes, S., and Salazar, L. 2003. Sweetpotato virus disease (SPVD):  
540 distribution, incidence and effect on sweetpotato yield in Peru. *Plant Dis.* 87,297-302.  
541
- 542 Gruneberg, W.J., Eyzaguirre, R., Espinoza, J., Mwanga, R.O., Andrade, M., Dapaah, H.,  
543 Tumwegamire, S., Agili, S., Ndingo-Chipungu, F.P., Attaluri, S. and Kapinga, R., Nguyen, T.,  
544 Kaiyung, X., Tjintokohadi, K., Carey, T. and Low, J. 2010. Procedures for the evaluation and  
545 analysis of sweetpotato trials. International Potato Center, Lima, Peru.  
546
- 547 Gruneberg, W.J., et al. 2015. Advances in sweet potato breeding from 1993 to 2012. In: Low, J.,  
548 Nyongesa, M., Quinn, S., Parker, M. (Eds.), *Potato and Sweet Potato in Africa, Transforming the*  
549 *Value Chains for Food and Nutrition Security.* www.cabi.org, za,pp. 1–77.
- 550
- 551 Hahn, S.K., Terry, E.R., and Leuschner, K. 1981. Resistance of sweetpotato to virus complex  
552 (SPVD). *Horticulture* 16:535–537.  
553
- 554 Hartmann, H.T., Kester, D.E., Davies, F.T., and Geneve, R.L. 1997. *Plant Propagation:*  
555 *Principles and Practices.* 6th edition. Prentice Hall International, INC. New Jersey.  
556
- 557 IsHak, J.A., Kreuze., Johansson, A., Mukasa, S.B., Tairo, F., AboEl-Abbas, F.M., and Valkonen,  
558 J.P.T. 2003. Some molecular characteristics of three viruses from SPVD - affected sweetpotato  
559 plants in Egypt. *Arch.Virol.*148,2449-2460.  
560  
561
- 562 Karyeija, R.F., Gibson, R.W., and Valkonen J.P.T. 1998.The significance of sweetpotato  
563 feathery mottle virus in subsistence sweetpotato production in Africa. *Plant Dis.* 82,4-15.  
564
- 565 Kays, S.J. 2005. Sweetpotato production worldwide: assessment trends and the future. *Acta*  
566 *Horticulturae* 670, 19-25.  
567
- 568 Kim, J., Yang, J. W., Kwak, H. R., Kim, M. K., Seo, J. K., Chung, M. N., ... Choi, H. S. 2017.  
569 Virus Incidence of Sweet Potato in Korea from 2011 to 2014. *The plant pathology journal*, 33(5),  
570 467–477.

571

- 572 Kivuva, B. M., Mwangi, S. G., Yencho, G. C., and Sibiya, J. 2015. Combining ability and  
573 heterosis for yield and drought tolerance traits under managed drought stress in sweetpotato.  
574 *Euphytica*, 201, 423-440.  
575
- 576 Kurabachew, H. 2015. The role of orange fleshed sweet potato (*Ipomea batatas*) for combating  
577 vitamin A deficiency in Ethiopia: a review. *Int. J. Food Sci. Nutr. Eng.* 5 (3), 141–146.  
578
- 579 Kwak, H.R., Kim, M.K., Shin, J.C., Lee, Y.J., Seo, J.K., Lee, H.U., Jung, M.N., Kim, S.H., and  
580 Choi, H.S. 2014. The current incidence of viral disease in Korean sweet potatoes and  
581 development of multiplex rt-PCR assays for simultaneous detection of eight sweet potato  
582 viruses. *Plant Pathol J.* ;30:416–424.  
583
- 584 Li, R., Salih, S., and Hurtt, S. 2004. Detection of geminiviruses in sweetpotato by polymerase  
585 chain reaction. *Plant Dis.* 88:1347-1351.  
586
- 587 Ling, K.-S., Jackson, D. M., Harrison, H., Simmons, A. M., and Pestic-VanEsbroeck, Z. 2010.  
588 Field evaluation on the yield effects of U.S. heirloom sweetpotato cultivars infected by  
589 Sweetpotato leaf curl virus. *Crop Protection.* 29:757-765.  
590
- 591 Lotrakul, P., Valverde, R. A., Clark, C. A., and Fauquet, C. 2003. Properties of a begomovirus  
592 isolated from sweetpotato [*Ipomoea batatas* (L.) Lam.] infected with sweet potato leaf curl virus.  
593 *Rev. Mex. Fitopatol.* 21:128-136.  
594
- 595 Lozano, G., Trenado, H. P., Valverde, R. A., and Navas-Castillo, J. 2009. Novel begomovirus  
596 species of recombinant nature in sweetpotato (*Ipomoea batatas*) and *Ipomoea indica*: Taxonomic  
597 and phylogenetic implications. *J. Gen. Virol.* 90:2550-2562.  
598
- 599 Luan, Y.S., Zhang, J., and An, L.J. 2006. First report of sweetpotato leaf curl virus in China.  
600 *Plant Dis.* 90, 1111.  
601
- 602 Maina, S., Miano, D. W., Mbogo, E., Amimo, J. O., Irungu, J., and Njiruh, P. N. 2017.  
603 Occurrence and genetic variability of partial coat protein gene of Sweet potato leaf curl virus  
604 (SPLCV) in Kenya. *African Journal of Biotechnology*, 16(45), 2112-2120.  
605
- 606 Maina S. 2014. Detection, distribution and genetic diversity of sweetpotato leaf curl virus from  
607 western, coast and central regions of Kenya. MSc. thesis, Kenyatta University, Kenya.  
608
- 609 Miano, D.W., LaBonte, D.R., Clark, C.A., Valverde, R.A., and Hoy, M.W. 2006. First report of  
610 a begomovirus infecting sweetpotato in Kenya. *Plant Dis.* 90(6):832.  
611
- 612 Milgram, M., Cohen, J., and Loebenstein, G. 1996. Effects of sweetpotato feathery mottle virus  
613 and sweetpotato sunken vein virus on sweetpotato yields and rates of reinfection of virus-free  
614 planting material in Israel. *Phytoparasitica* 24:189-193.

- 615  
616 Motsa, N. M., Modi, A. T., & Mabhaudhi, T. 2015. Sweet potato (*Ipomoea batatas* Lam) as a  
617 drought tolerant and food security crop. *South African Journal of Science*, 111, 1–8.
- 618
- 619 Mukasa, S.B. 2004. Genetic Variability and Interactions of Three Sweetpotato Infecting Viruses.  
620 Uppsala, Sweden: Swedish University of Agricultural Sciences, PhD thesis.
- 621
- 622 Mulabisana, J., Cloete, M., Laurie, S., Mphela, W.M., Maserumule, M.M., Nhlapo, T.,  
623 Cochrane, N.M., Oelofse, D., and Rey, Chrissie. 2019. Yield evaluation of multiple and co-  
624 infections of begomoviruses and potyviruses on sweet potato varieties under field conditions and  
625 confirmation of multiple infection by NGS. *Crop Protection*. 119. 10.1016.
- 626
- 627 Mwangi, R.O., Odongo, B., Niringiye, C., Alajo, A., Abidin, P.E., Kapinga, R., Carey, E.E. 2007.  
628 Release of two orange-fleshed sweetpotato cultivars; SPK004 - “Kakamega” and “Ejumula”, in  
629 Uganda. *HortScience* 42(7):1728-1730.
- 630
- 631 Ngeve, J. M., and Bouwkamp, J. C. 1993. Comparison of statistical methods to assess yield  
632 stability in sweetpotato. *J. Am. Soc. Hortic. Sci.* 118:304-310.
- 633
- 634 Njeru, R.W., Mburu, M.W.K., Cheramgoi, E., et al . et al. 2004. Studies on the physiological  
635 effects of viruses on sweet potato yield in Kenya. *Annals of Applied Biology* 145, 71–76.
- 636
- 637 Paprotka, T., Boiteux., L.S., Fonseca, M.E., Jeske, H., Faria, J.C., and Riberio, S.G. 2010.  
638 Genomic diversity of sweet potato geminiviruses in a Brazilian germplasm bank. *Virus Research*  
639 149, 224–33.
- 640
- 641 Prasanth, G., and Hegde, V. 2008. Occurrence of *sweetpotato feathery mottle virus* and *Sweet*  
642 *potato leaf curl* Georgia virus on sweetpotato in India. *Plant Dis* 92:311.
- 643
- 644 Roitsch, T., Balibrea, H.E., Hofmann, M., Proels, R., and Sinha, A.K. 2003. The upregulation of  
645 extracellular invertase was suggested to be a common response to various biotic and abiotic  
646 stress related stimuli like pathogen infection and salt stress; *J. Exp. Bot.* 54 513–524.
- 647
- 648 Simmons, A.M., Harrison, H.F., and Ling, K.-S. 2008. Forty-nine new host plant species for  
649 *Bemisia tabaci* (Hemiptera: Aleyrodidae). *Entomol. Sci.* 11, 385–390.
- 650
- 651 Tairo, F., Mukasa, S.B., Jones, R.C., Kullaya, A., Rubaihayo, P.R., and Valkonen, J.P.T. 2005.  
652 Unravelling the genetic diversity of the three main viruses involved in sweetpotato virus disease  
653 (SPVD), and its practical implications. *Mol. Plant Pathol.* 6, 199-211.

654

655 Tugume, AK., Amayo, R; Weinheimer I., Mukasa, SB., Rubaihayo, PR., et al. 2013. Genetic  
656 Variability and Evolutionary Implications of RNA Silencing Suppressor Genes in RNA1 of  
657 *Sweet Potato Chlorotic Stunt Virus* Isolates Infecting Sweetpotato and Related Wild Species.  
658 PLoS ONE 8(11): e81479. doi:10.1371/journal.pone.0081479.

659

660 Untiveros, M., Fuentes, S. and Salazar, L.F. 2007. Synergistic interaction of Sweetpotato  
661 chlorotic stunt virus (Crinivirus) with carla-, cucumo-, ipomo-, and potyviruses infecting  
662 sweetpotato. Plant Dis. 91, 669–676.

663

664

665 Wasswa, P., Otto, B., Maruthi, M., Mukasa, S., Monger, W., and Gibson, R. 2011. First  
666 identification of a sweetpotato begomovirus (sweepovirus) in Uganda: Characterization,  
667 detection and distribution. Plant Pathology 60, 1030–1039.

668

669

670

671  
672

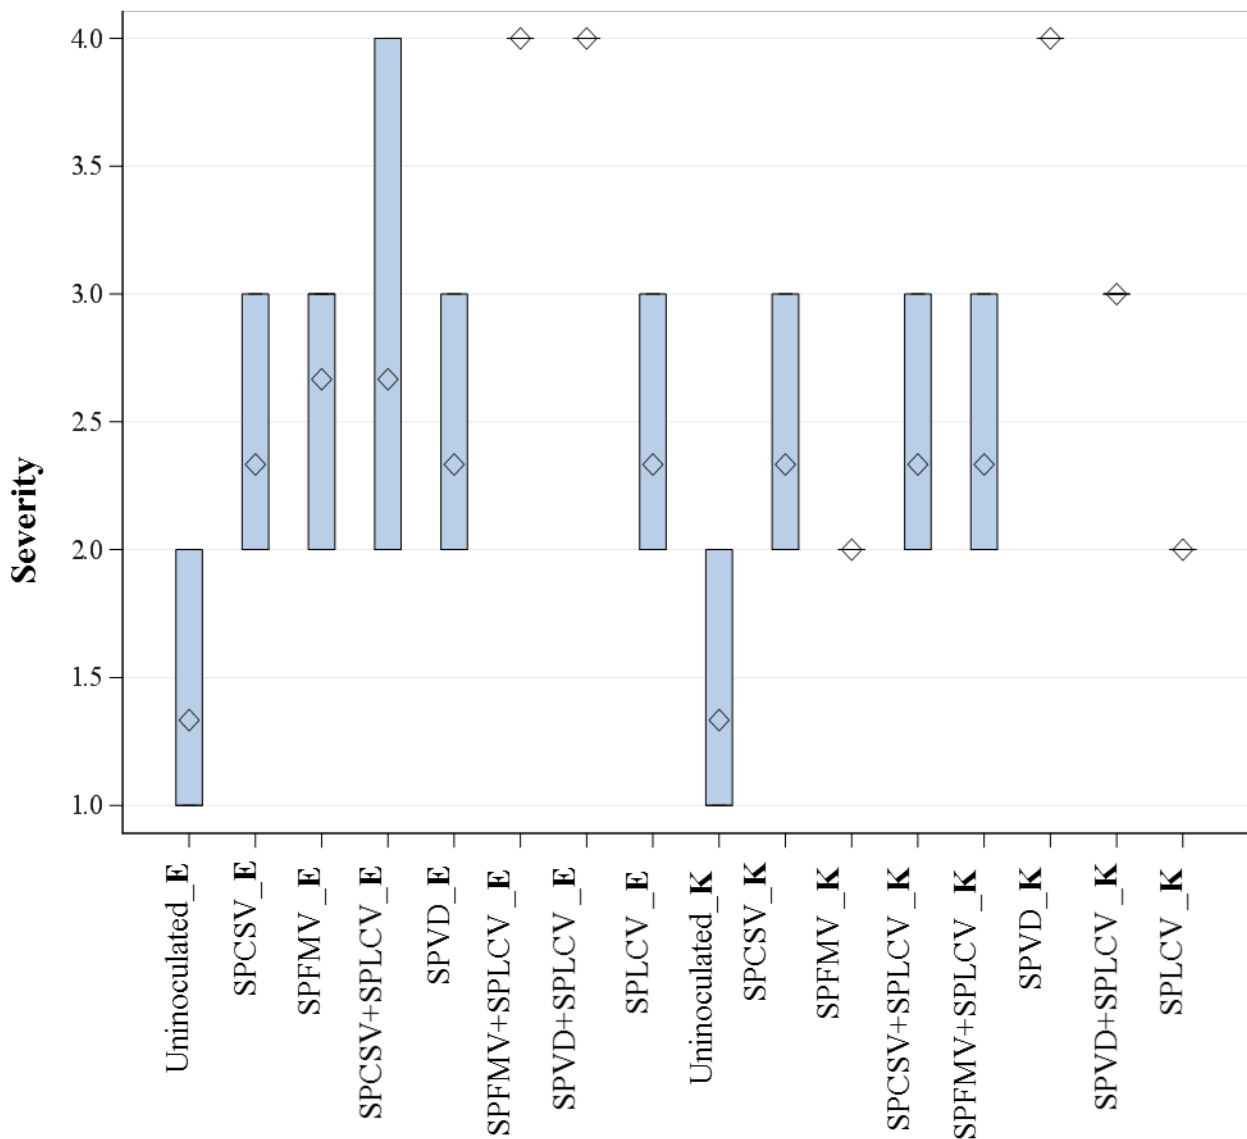

673  
674

675 **Figure 1:** Box-plot for disease severity inoculated with different viruses for combined means for  
676 season I\_II; expressed varying level of disease symptoms. Severity score of 1 depicts mild  
677 symptom expression while 5 is pronounced. All the treatments for Ejumula are abbreviated **E**  
678 and **K** for Kakamega.

679  
680  
681  
682  
683

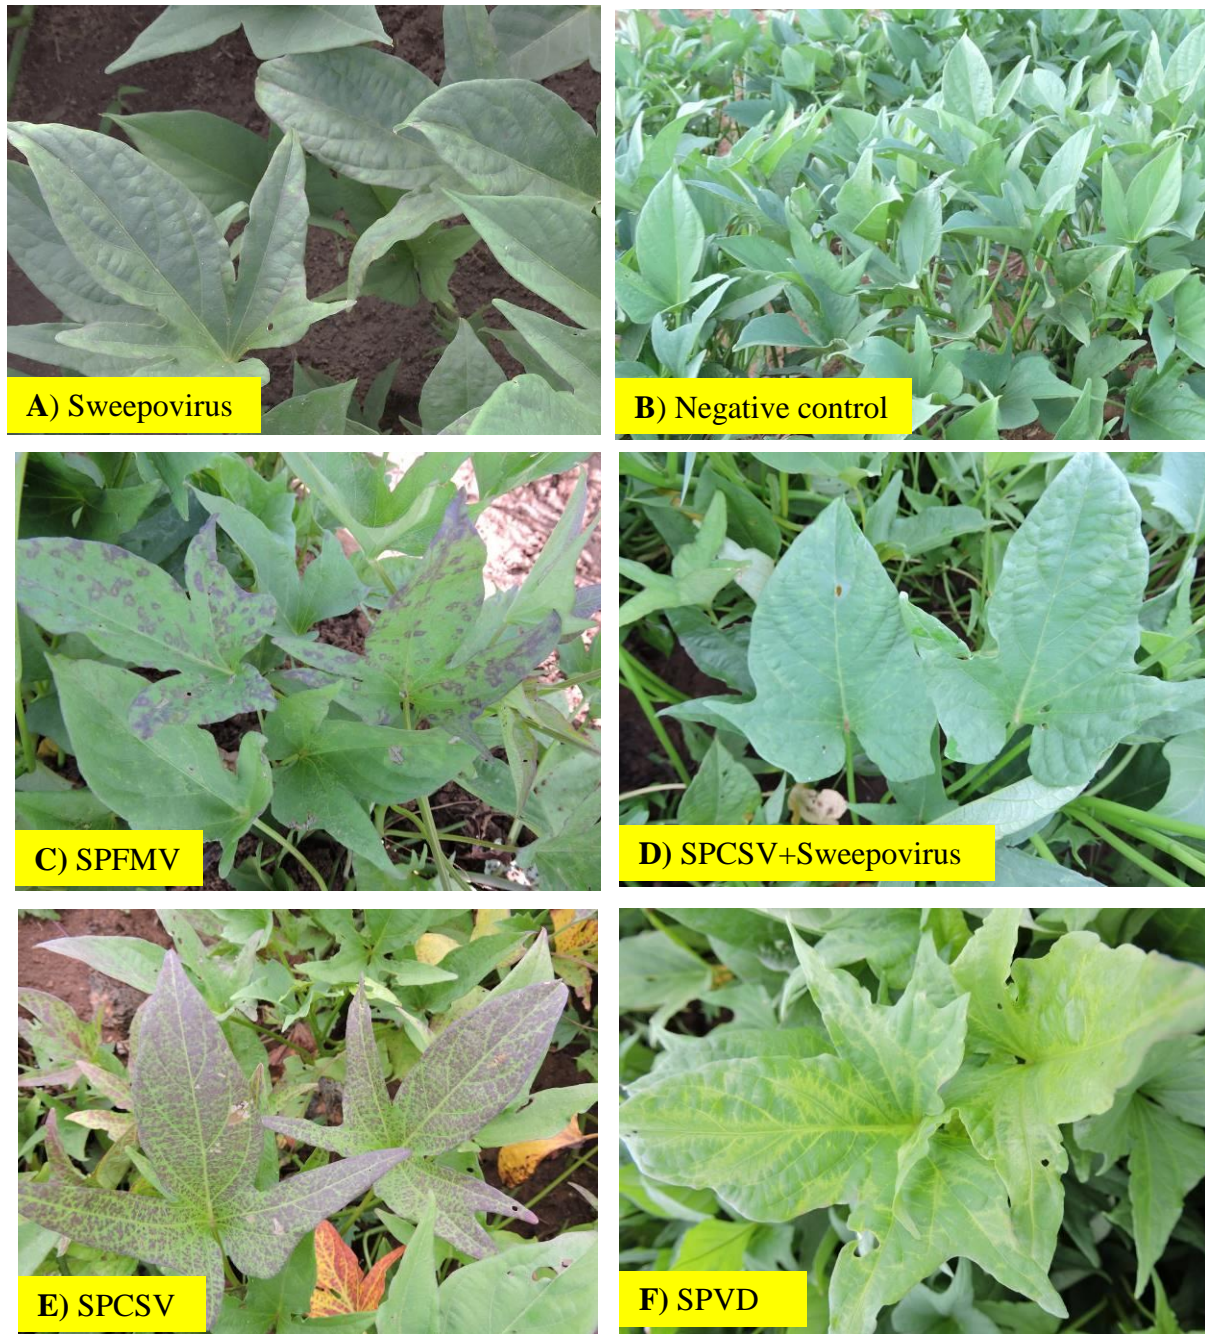

684 **Figure 2:** Symptom expression due to single or mixed infection on 'Ejumula' by *Sweet potato*  
685 *leaf curl virus* (SPLCV), *Sweet potato feathery mottle virus* (SPFMV), and *Sweet potato*  
686 *chlorotic stunt virus* (SPCSV) under field conditions. **A** – rugosity due to SPLCV, **B** –  
687 uninfected, **C** - purple spot due to SPFMV, **D** - rugosity and chlorotic spots due to  
688 SPCSV+Begomo, **E** - purpling of older leaves due to SPCSV and **F** - vein clearing, chlorosis,  
689 leaf reduction/deformation–SPVD.

690



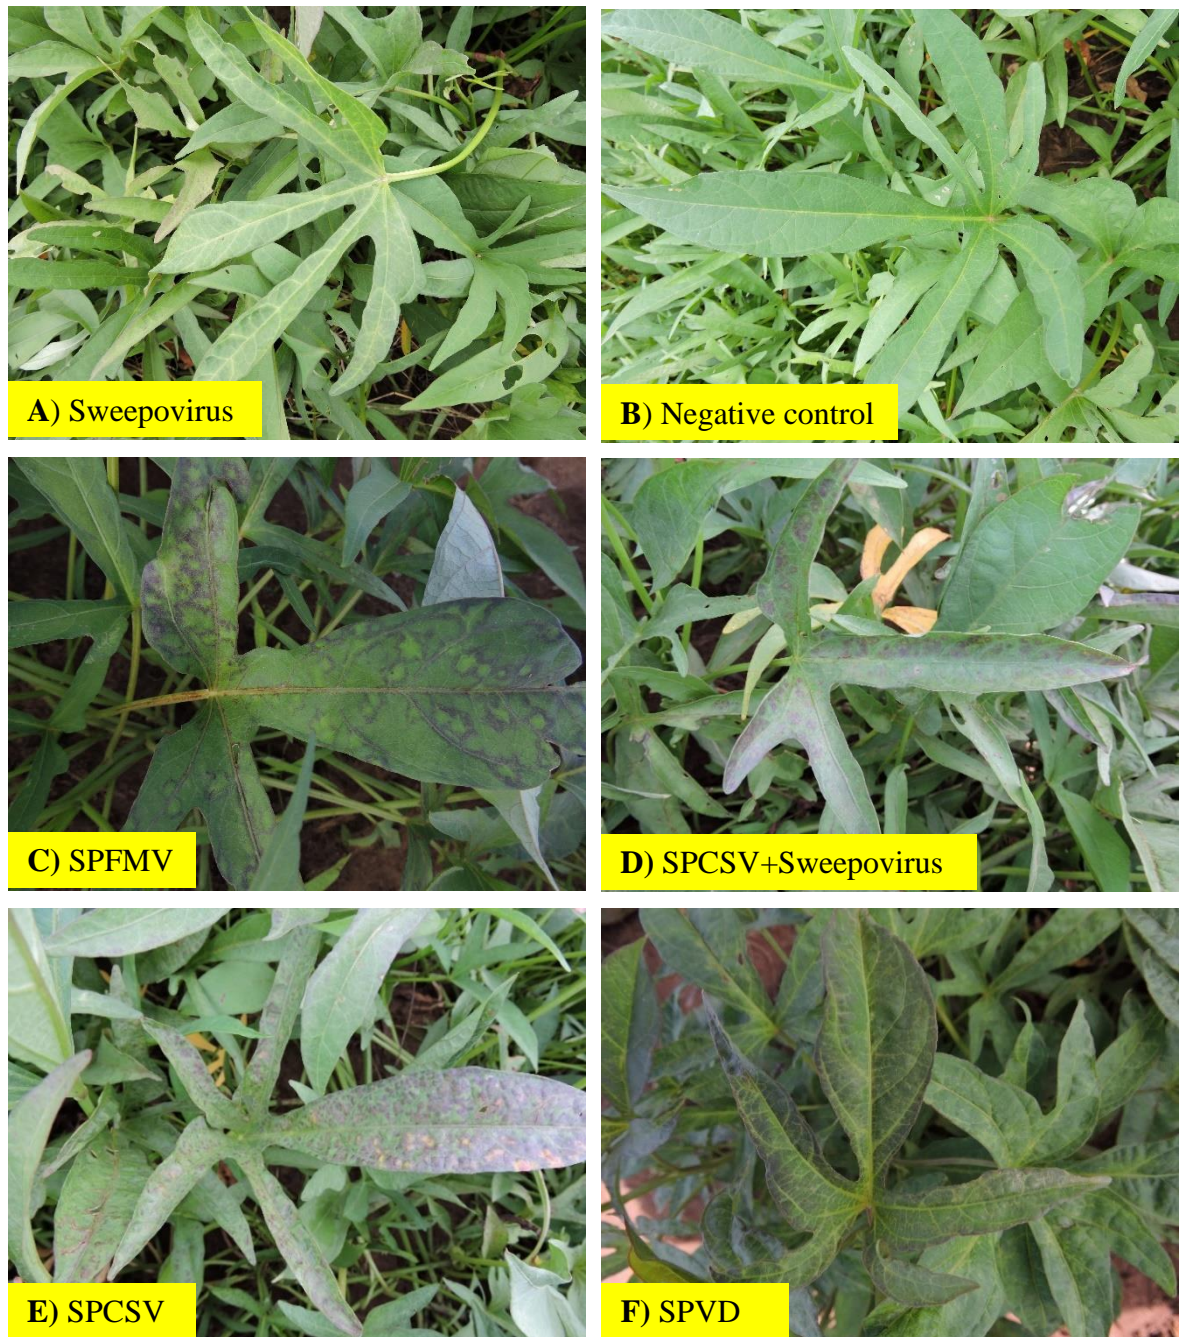

691

692 **Figure 3:** Symptom expression due to single or mixed infection on 'Kakamega' by *Sweet potato*  
693 *leaf curl virus* (SPLCV), *Sweet potato feathery mottle virus* (SPFMV), and *Sweet potato*  
694 *chlorotic stunt virus* (SPCSV) under field conditions. **A** – chlorosis and vein clearing to SPLCV,  
695 **B** – uninfected, **C** - purple spot due to SPFMV, **D** - purpling and roll up due to SPCSV+Begomo,  
696 **E** - bottom left – purpling of older leaves due to SPCSV and **F** - vein clearing, chlorosis, leaf  
697 reduction/deformation–SPVD.

698

699 **Distribution of total root yield of t ha<sup>-1</sup>**

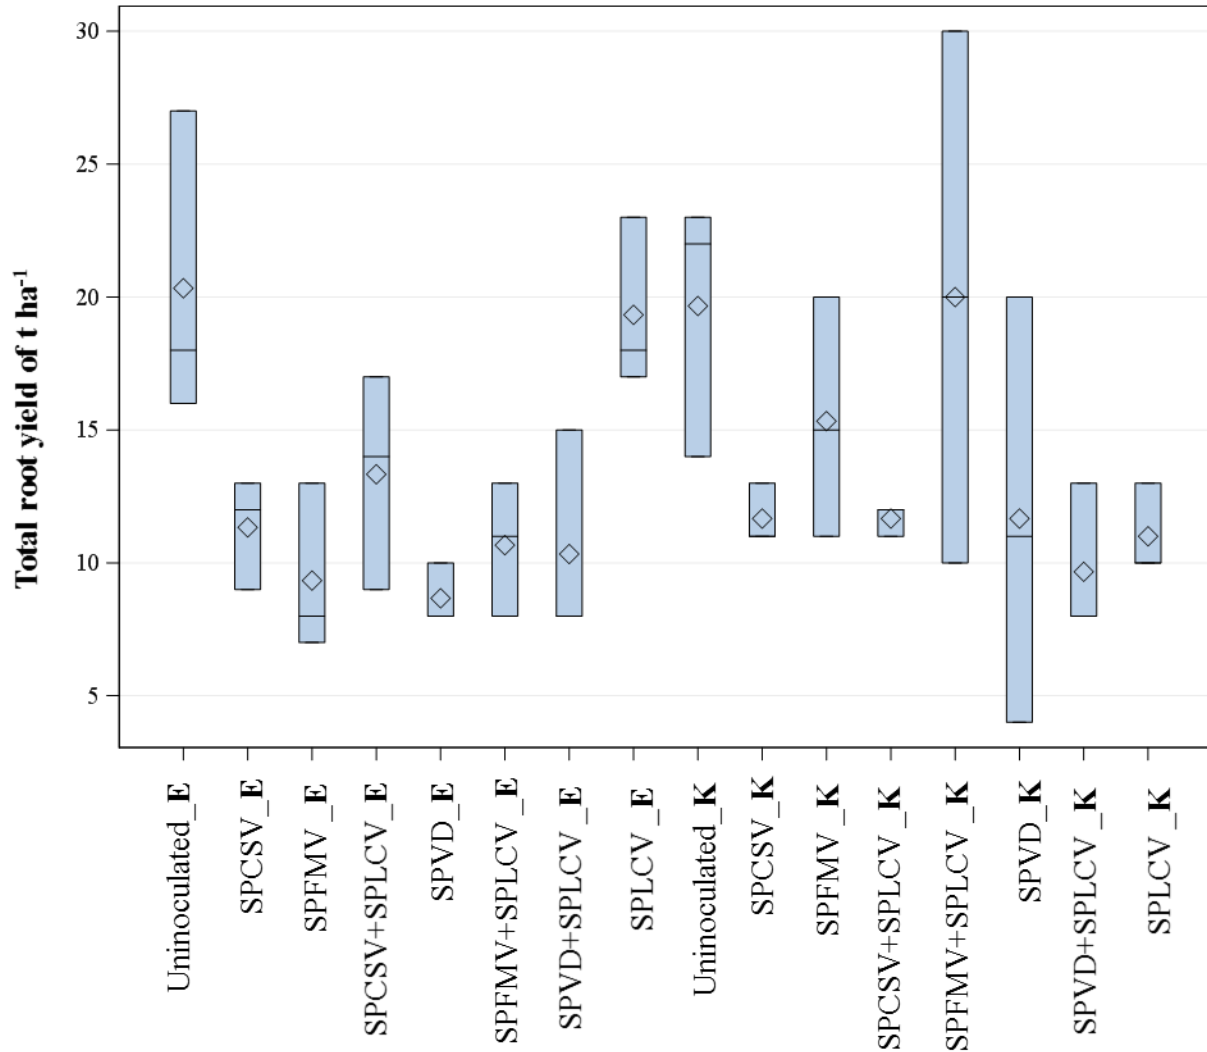

700

701 **Figure 4:** Box-plot root yield in t ha<sup>-1</sup> for treatments inoculated with different viruses. All the  
702 treatments for Ejumula are abbreviated **E** and **K** for Kakamega.

703

704

705

706

707

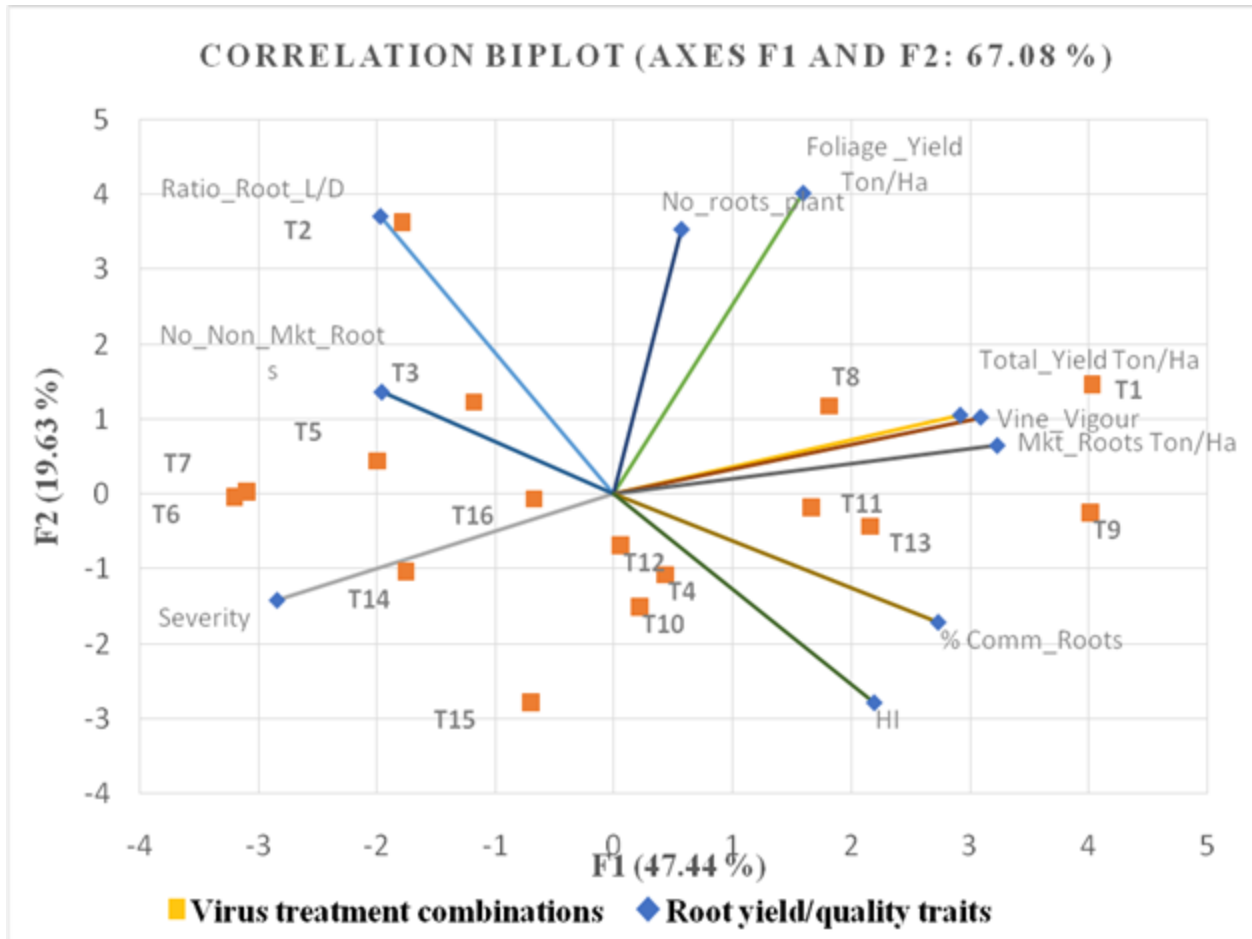

708

709

710 **Figure 5:** Correlation biplot (CB) representing root yield/quality traits observations and virus  
711 treatment variables. Narrow angles depict positively related observations, right angle unrelated  
712 and obtuse (wide) angle negatively related. See **Table 1** for treatment descriptions.

713

714

715

716

717

718

719

720

721

722

723

724

725

726

727  
728  
729  
730  
731  
732  
733  
734  
735  
736  
737  
738  
739  
740  
741  
742  
743  
744  
745  
746  
747  
748

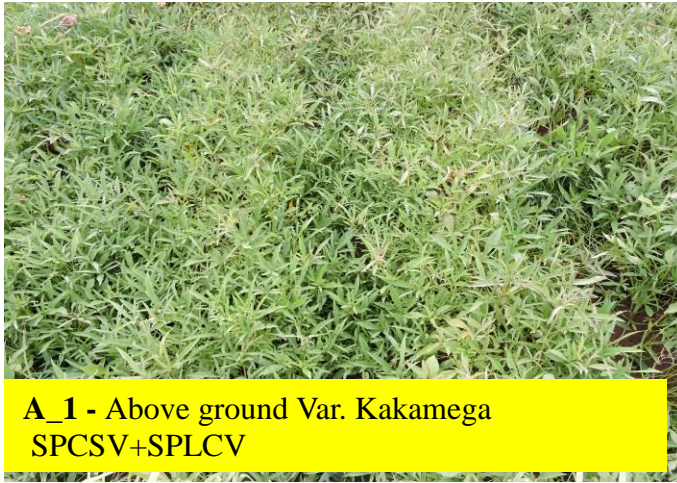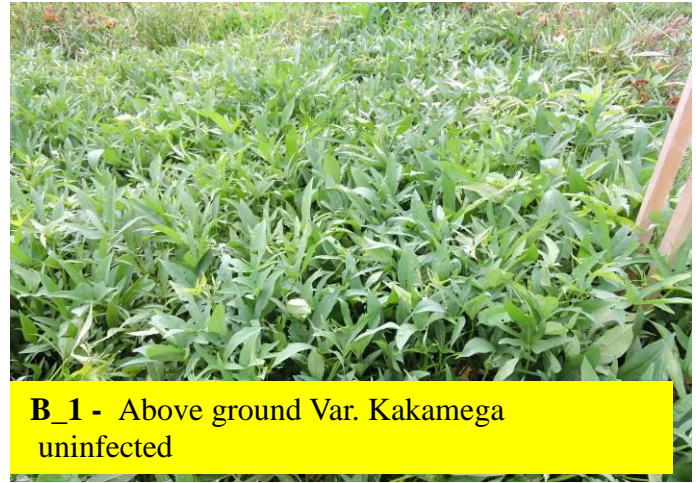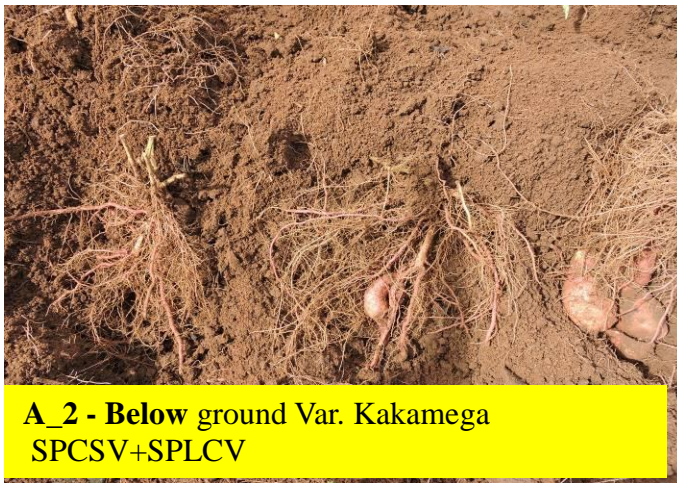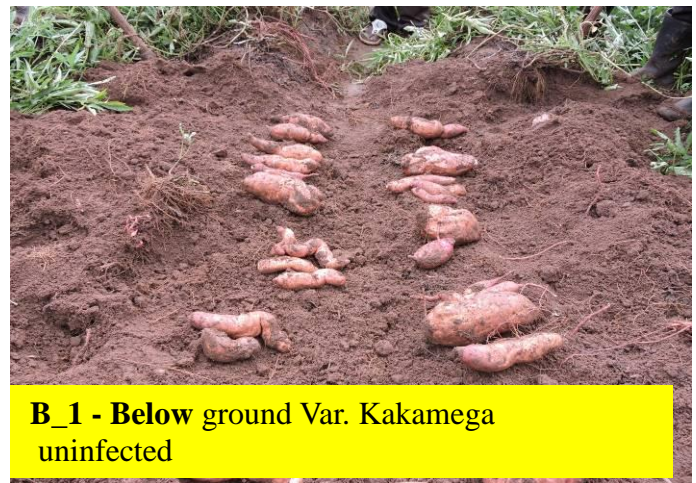

**Supplementary Figure 1:** Effect of SPLCV+SPCSV on root formation of Var. Kakamega; A\_1 – vigorous above ground cover and A\_2 – fibrous root formation and B\_1 and B\_2 – vigorous ground cover and B\_2 – good root formation.

749

750

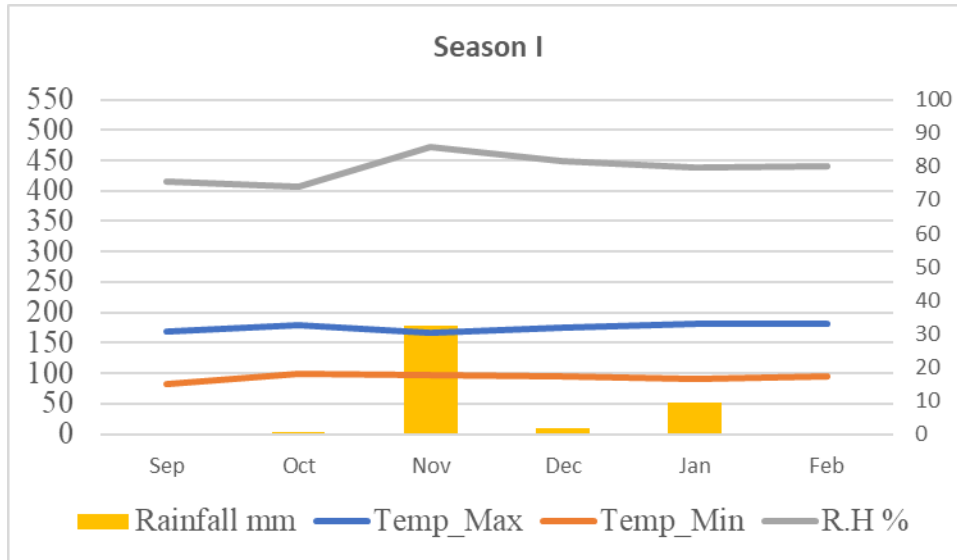

751

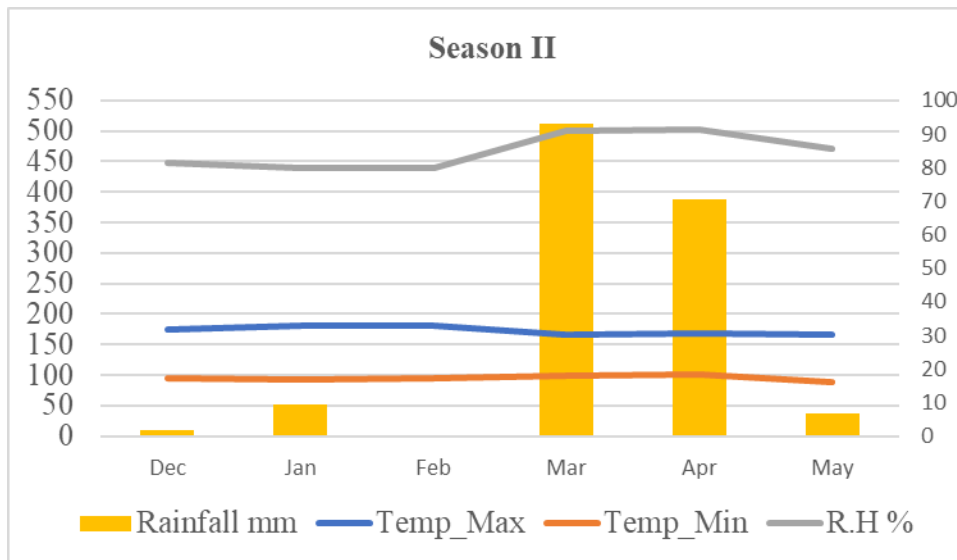

752

753 **Supplementary Figure 2.** Monthly average climate data (2017 - 2018) rainfall (left axis),  
754 temperature, relative humidity (right axis) at KALRO Kiboko, Makeni, Kenya.

755

756 Data were made available courtesy ICRISAT field station Kiboko.

757

758

759 **Table 1.** Description of treatments (viruses and their combinations) used to evaluate the effect of  
 760 different viruses on sweetpotato varieties Ejumula and Kakamega.

| Treatment | Plot No               | Cultivar | Treatment description |
|-----------|-----------------------|----------|-----------------------|
| T1        | 15/30/43              |          | Non infected          |
| T2        | 5/17 <sup>1</sup> /40 |          | SPCSV                 |
| T3        | 16/31/47              |          | SPFMV                 |
| T4        | 9/27/41               | Ejumula  | SPLCV +SPCSV          |
| T5        | 3/22/33               |          | SPLCV +SPFMV          |
| T6        | 12/23/46              |          | SPVD                  |
| T7        | 14/19/36              |          | SPLCV +SPVD           |
| T8        | 10/25/44              |          | SPLCV                 |
| T9        | 4/24 <sup>2</sup> /39 |          | Non infected          |
| T10       | 11/29/34              |          | SPCSV                 |
| T11       | 1/20/48               |          | SPFMV                 |
| T12       | 7/21/35               | Kakamega | SPLCV +SPCSV          |
| T13       | 6/32/42               |          | SPLCV +SPFMV          |
| T14       | 8/26/38               |          | SPVD                  |
| T15       | 13/28/37              |          | SPLCV +SPVD           |
| T16       | 2/18 <sup>3</sup> /45 |          | SPLCV                 |

761

762 **Key:** SPCSV - *Sweet potato chlorotic stunt virus*, SPFMV - *Sweet potato feathery mottle virus* ,  
 763 SPLCV – *Sweet potato leaf curl virus* and SPVD - *Sweet potato virus disease*.

764 <sup>1</sup> Plot positive for sweepovirus in bulk PCR test at end of season I

765 <sup>2</sup> Plot positive for SPCSV in bulk PCR at end of season I

766 <sup>3</sup> Plot positive for SPFMV in bulk PCR test at end of season I, and SPCSV at end of season II

767

768

769 **Table 2.** Yield parameters for sweetpotato inoculated with *Sweet potato leaf curl virus* (SPLCV), *Sweet potato feathery mottle virus*  
770 (SPFMV), and *Sweet potato chlorotic stunt virus* (SPCSV), alone and in all possible combinations on varieties Ejumula and  
771 Kakamega for Season I and Season II combined; Values shown are means for the 16 treatments.

| <b>Yield parameter Season I and II</b> |                   |                           |                                    |                           |                                                |                |       |  |  |
|----------------------------------------|-------------------|---------------------------|------------------------------------|---------------------------|------------------------------------------------|----------------|-------|--|--|
| <b>Treatment</b>                       | Severity<br>(1-5) | Number roots<br>per plant | Number marketable<br>storage roots | Ratio<br>length: diameter | root<br>Total root<br>yield t ha <sup>-1</sup> | %<br>reduction | Yield |  |  |
| Negative Cntl_Ejumula                  | 1.33 e            | 6.00 abcd                 | 29.33 ns                           | 3.573 bcd                 | 15.92 abc                                      | Control        |       |  |  |
| SPCSV_Ejumula                          | 2.33 cd           | 4.82 efgh                 | 24.17 ns                           | 4.81 a                    | 10.11 e                                        | 38             |       |  |  |
| SPFMV_Ejumula                          | 2.67 bc           | 5.02 defgh                | 25.17 ns                           | 3.84 b                    | 9.14 e                                         | 44             |       |  |  |
| SPLCV+SPCSV_Ejumula                    | 2.67 bc           | 5.28 bcdef                | 21.00 ns                           | 3.365 bcd                 | 11.56 bcde                                     | 25             |       |  |  |
| Sweepo +SPFMV_Ejumula                  | 2.17 cd           | 5.25 bcdef                | 22.67 ns                           | 3.816 bc                  | 9.17 e                                         | 44             |       |  |  |
| SPVD_Ejumula                           | 3.67 a            | 4.43 fgh                  | 22.17 ns                           | 3.633 bcd                 | 11.25 cde                                      | 32             |       |  |  |
| SPLCV +SPVD_Ejumula                    | 3.67 a            | 4.03 h                    | 21.17 ns                           | 3.664 bcd                 | 9.11 e                                         | 44             |       |  |  |
| SPLCV_Ejumula                          | 2.17 cd           | 5.0.7 cdefg               | 26.50 ns                           | 3.369 bcd                 | 15.64 abcd                                     | 0              |       |  |  |
| Negative Cntl_Kakamega                 | 1.17 e            | 6.17 ab                   | 22.83 ns                           | 3.225 d                   | 16.50 a                                        | Control        |       |  |  |
| SPCSV_Kakamega                         | 2.33 cd           | 5.63 abcde                | 19.33 ns                           | 3.428 bcd                 | 13.28 abcde                                    | 24             |       |  |  |
| SPFMV_Kakamega                         | 2.00 d            | 6.15 ab                   | 22.67 ns                           | 3.856 b                   | 15.78 abcd                                     | 6              |       |  |  |
| SPLCV +SPCSV_Kakamega                  | 2.17 cd           | 5.75 abcde                | 19.17 ns                           | 3.108 d                   | 12.22 abcde                                    | 29             |       |  |  |
| SPLCV +SPFMV_Kakamega                  | 2.17 cd           | 6.00 abcd                 | 19.50 ns                           | 3.525 bcd                 | 16.17 ab                                       | 6              |       |  |  |
| SPVD_Kakamega                          | 3.83 a            | 6.07 abc                  | 13.67 ns                           | 3.86 b                    | 12.75 abcde                                    | 24             |       |  |  |
| SPLCV+SPVD_Kakamega                    | 3.00 b            | 6.57 a                    | 16.83 ns                           | 3.247 cd                  | 10.94 de                                       | 35             |       |  |  |
| SPLCV_Kakamega                         | 2.00 d            | 4.227 gh                  | 17.33 ns                           | 3.585 bcd                 | 9.08 e                                         | 47             |       |  |  |
| <b><i>F pr.</i></b>                    | <.001             | <.001                     | 0.053                              | <.001                     | <.001                                          |                |       |  |  |
| <b><i>LSD 5 %</i></b>                  | 0.538             | 1                         | 8.161                              | 0.575                     | 4.9                                            |                |       |  |  |
| <b><i>cv%</i></b>                      | 8.1               | 5.8                       | 8.2                                | 1.6                       | 9                                              |                |       |  |  |

772 \* Values within the same column followed by identical letters are not statistically different (ns – not significant). ANOVA, Fisher's  
773 protected Least Significance Difference test.

774

775 **Table 3.** Pearson correlation coefficients showing pair-wise associations for yield and yield contributing characters of sweetpotato var.  
 776 Ejumula and var. Kakamega using virus tested and virus infected (with SPLCV, SPFMV, and SPCSV, alone and in all possible dual  
 777 combinations) evaluated for two seasons in Kenya.  
 778

| Variables            | Severity      | Vine Vigor   | Ratio Root Length/<br>Diameter | Foliage Yield<br>Ton/Ha | No. roots<br>per<br>plant | Total<br>root<br>yield<br>t ha <sup>-1</sup> | Mkt<br>Roots<br>Ton/Ha | %<br>Comm<br>Roots | No.<br>Non<br>Mkt<br>Roots | Harve<br>st<br>index<br>(HI) |
|----------------------|---------------|--------------|--------------------------------|-------------------------|---------------------------|----------------------------------------------|------------------------|--------------------|----------------------------|------------------------------|
| Severity             | <b>1</b>      |              |                                |                         |                           |                                              |                        |                    |                            |                              |
| Vine_Vigour          | <b>-0.925</b> | <b>1</b>     |                                |                         |                           |                                              |                        |                    |                            |                              |
| Ratio_Root_L_D       | 0.204         | -0.189       | <b>1</b>                       |                         |                           |                                              |                        |                    |                            |                              |
| Foliage_Yield Ton/Ha | -0.485        | 0.364        | 0.180                          | <b>1</b>                |                           |                                              |                        |                    |                            |                              |
| No_roots_plant       | -0.137        | 0.192        | 0.188                          | 0.319                   | <b>1</b>                  |                                              |                        |                    |                            |                              |
| Total_Yield Ton/Ha   | <b>-0.605</b> | <b>0.654</b> | -0.387                         | 0.485                   | 0.338                     | <b>1</b>                                     |                        |                    |                            |                              |
| Mkt_Roots Ton/Ha     | <b>-0.599</b> | <b>0.605</b> | -0.482                         | <b>0.547</b>            | 0.283                     | <b>0.910</b>                                 | <b>1</b>               |                    |                            |                              |
| % Comm_Roots         | <b>-0.590</b> | 0.490        | <b>-0.653</b>                  | 0.285                   | -0.283                    | <b>0.528</b>                                 | <b>0.678</b>           | <b>1</b>           |                            |                              |
| No_Non_Mkt_Roots     | 0.296         | -0.428       | 0.371                          | -0.193                  | 0.153                     | -0.337                                       | -0.420                 | -0.426             | <b>1</b>                   |                              |
| Harvest index (HI)   | -0.313        | 0.494        | <b>-0.629</b>                  | -0.325                  | 0.069                     | <b>0.536</b>                                 | <b>0.528</b>           | 0.405              | -0.333                     | <b>1</b>                     |

779  
 780 Values in bold are different from 0 with a significance level alpha = 0.05  
 781

782  
 783
